# Supplementary material
Source: bioRxiv or medRxiv preprint supplement (https://www.biorxiv.org/highwire/filestream/76703/field_highwire_adjunct_files/0/198614-1.zip)

**rank = 2**

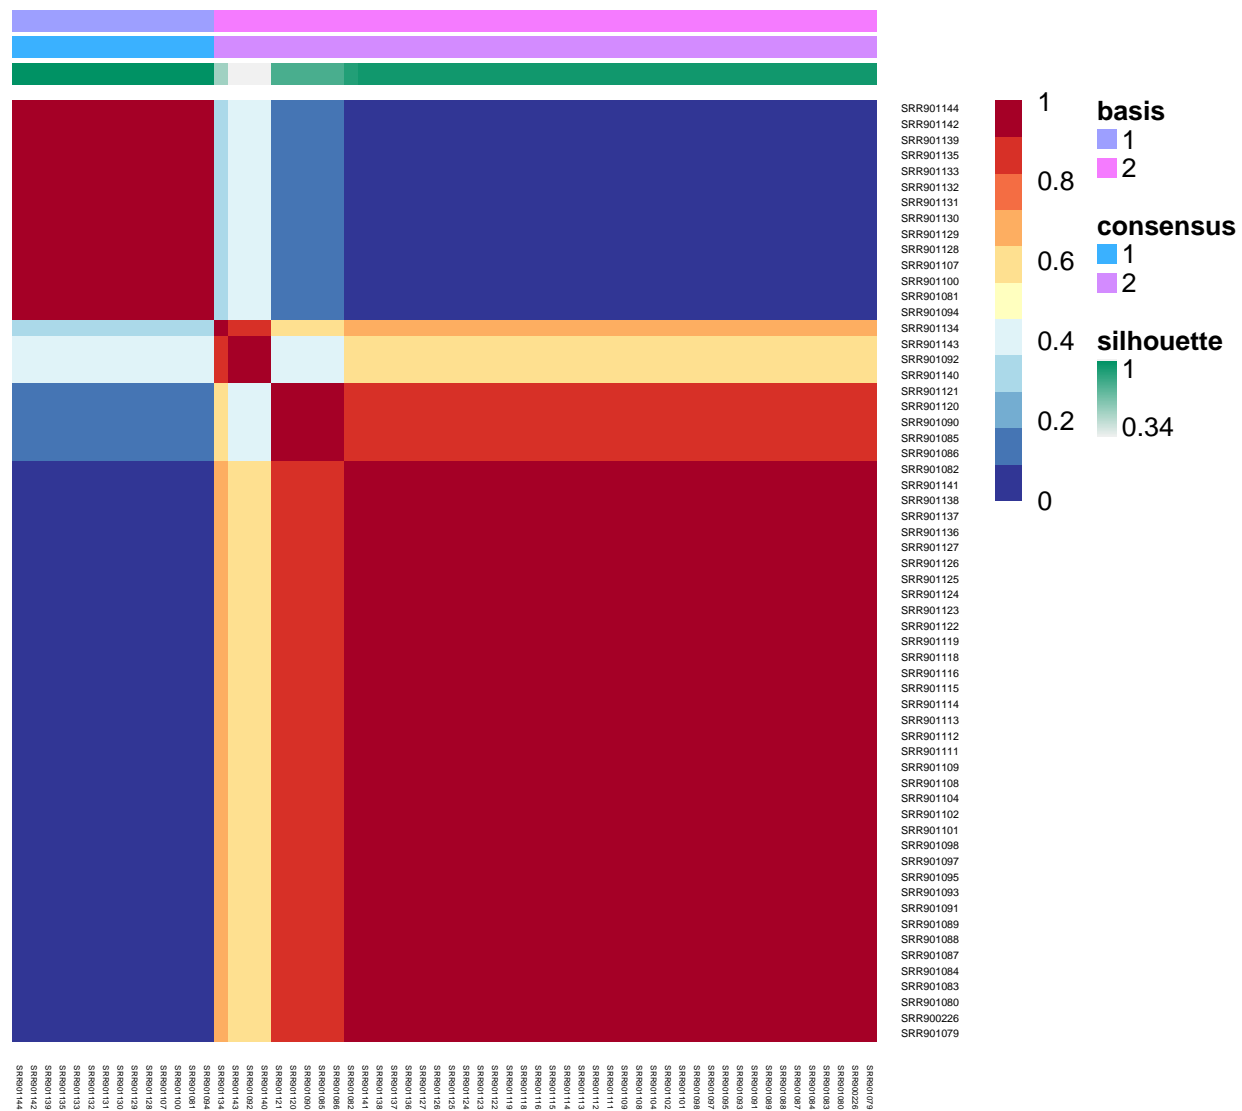

**rank = 3**

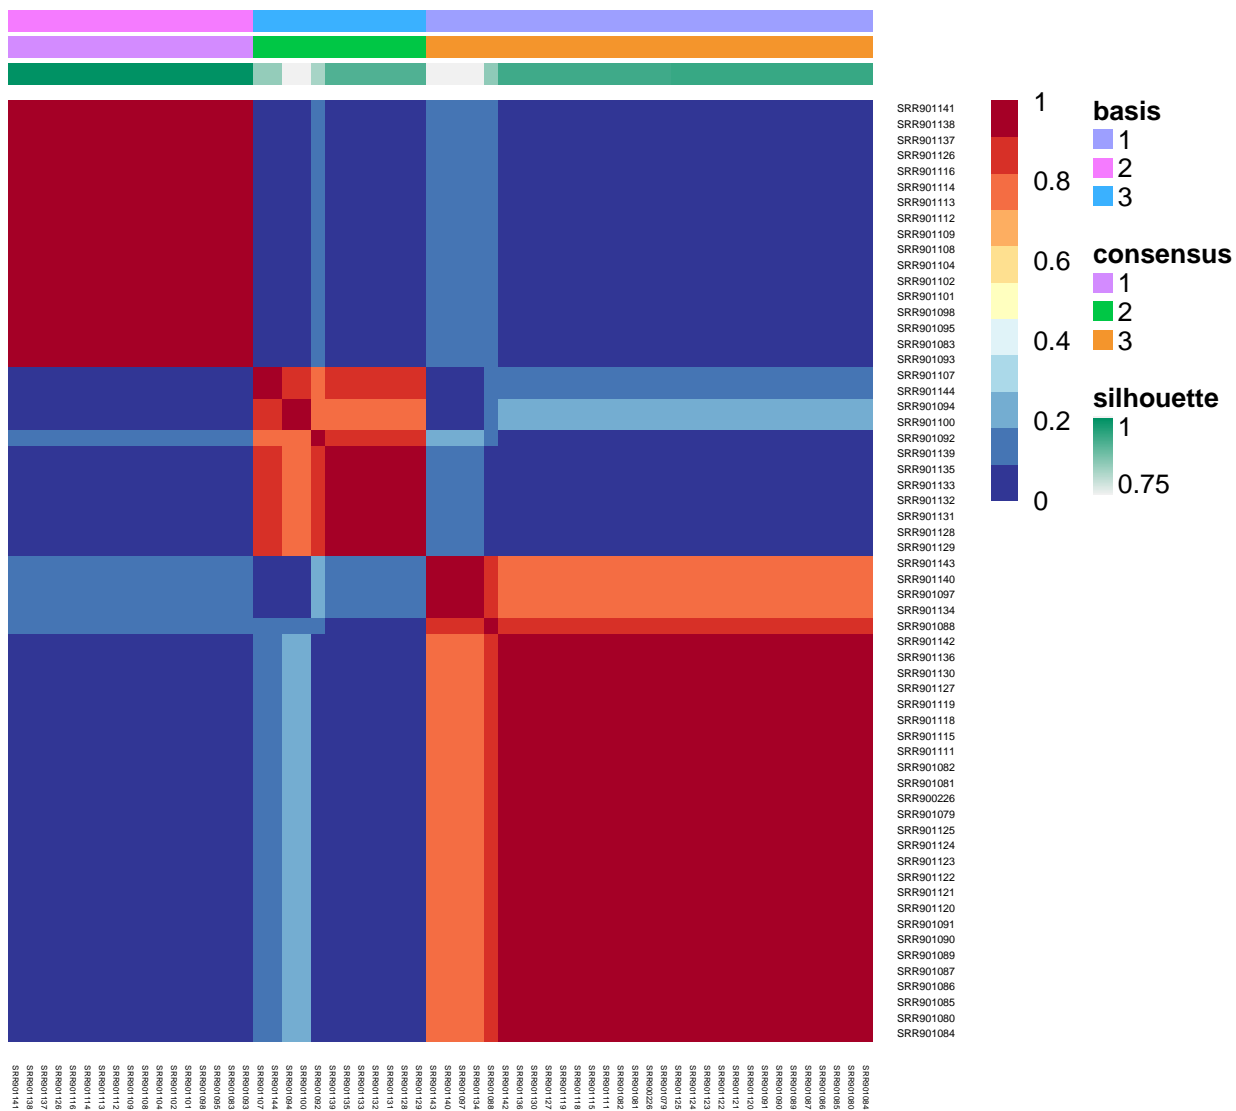

**rank = 4**

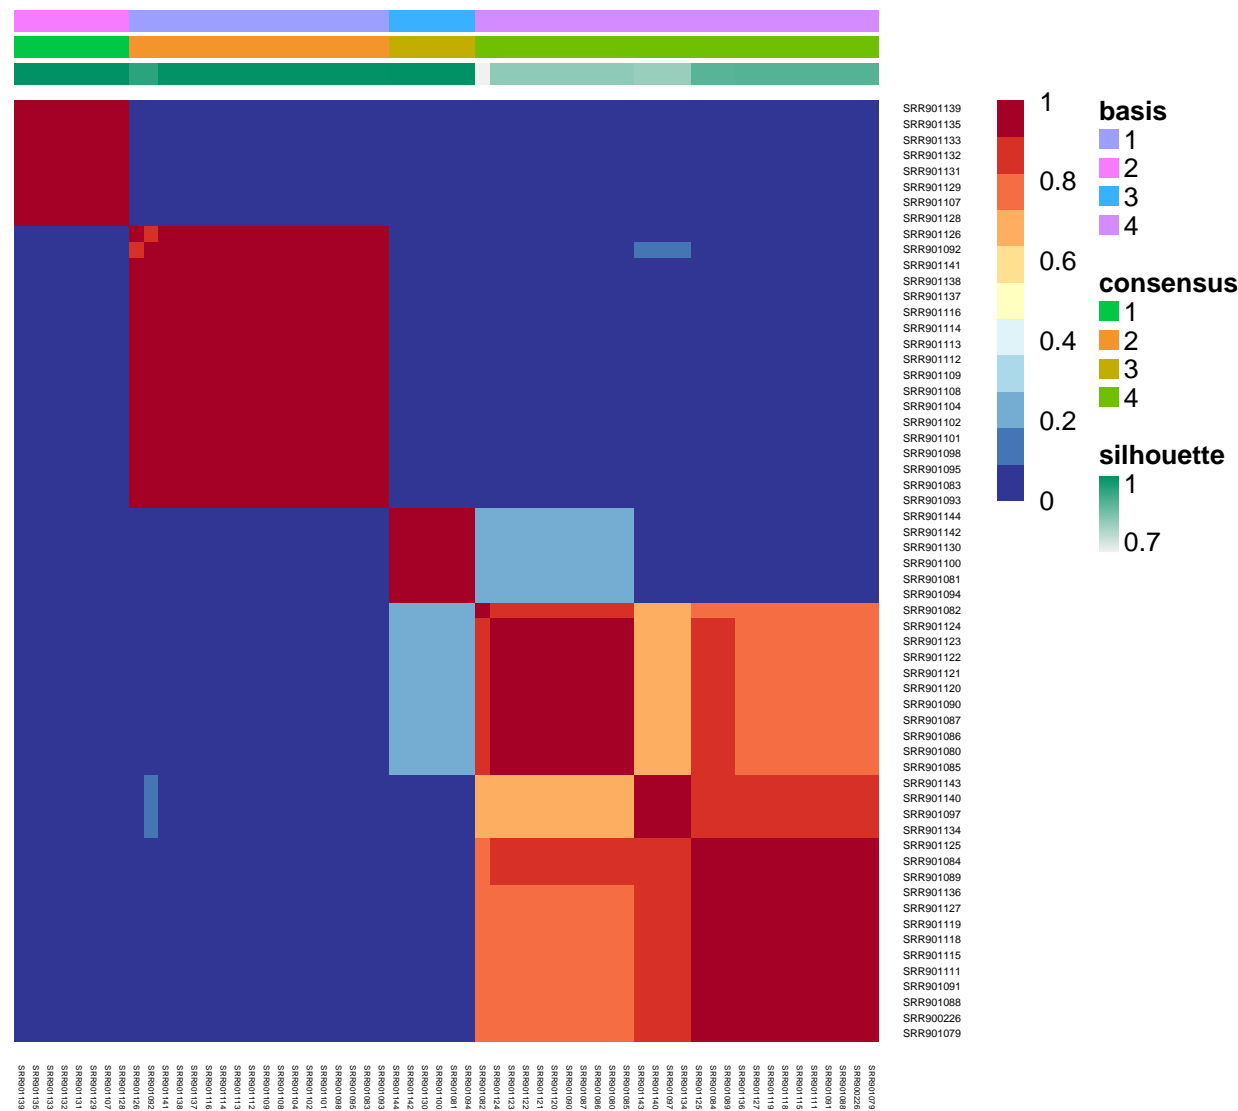

**rank = 5**

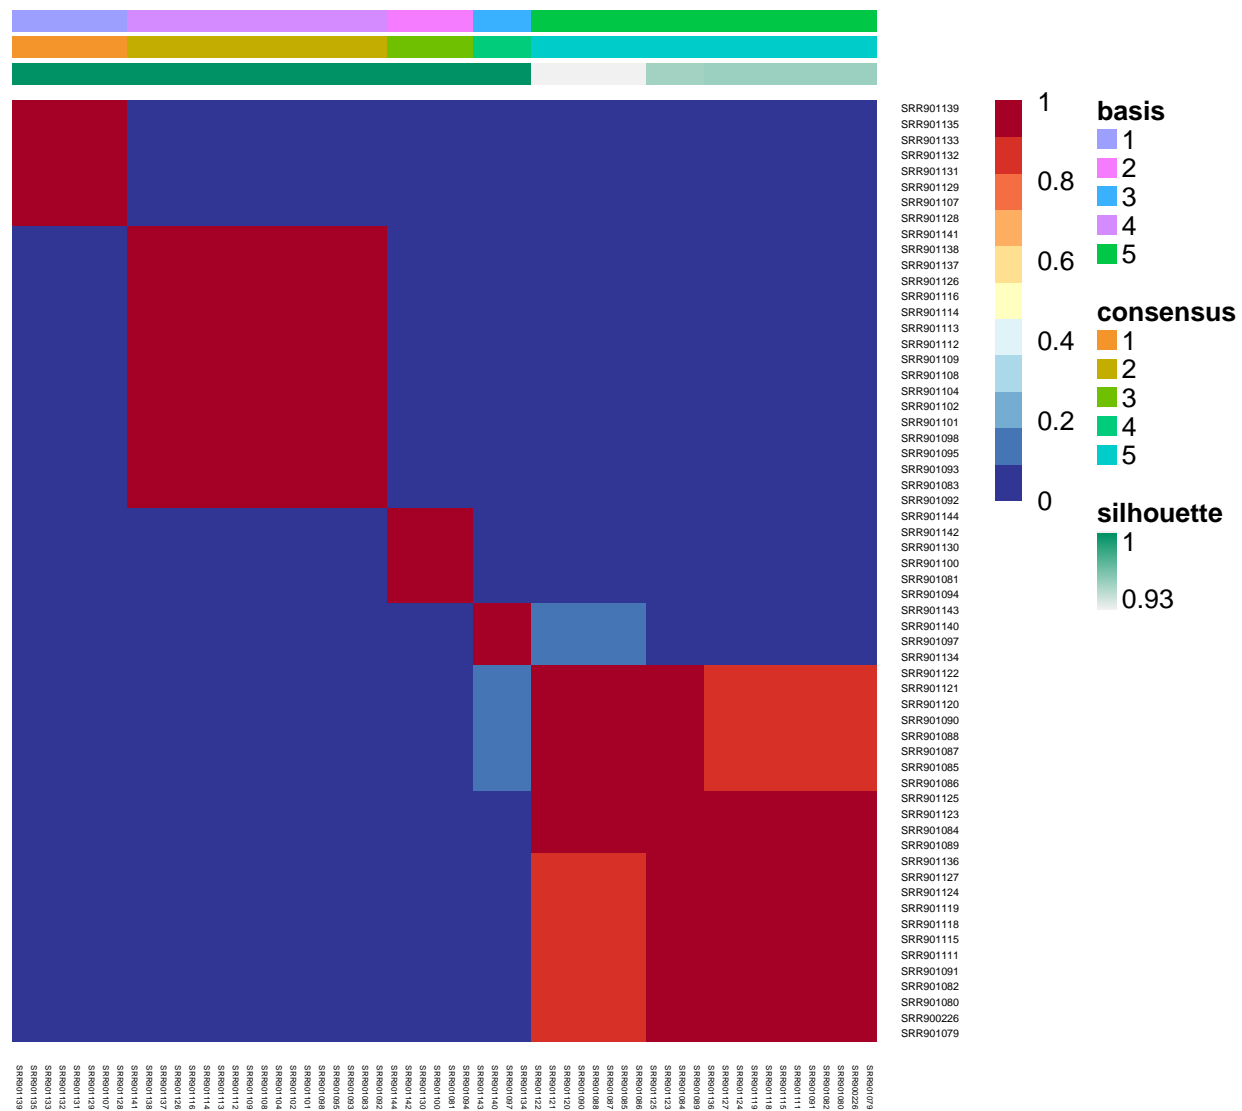

**rank = 6**

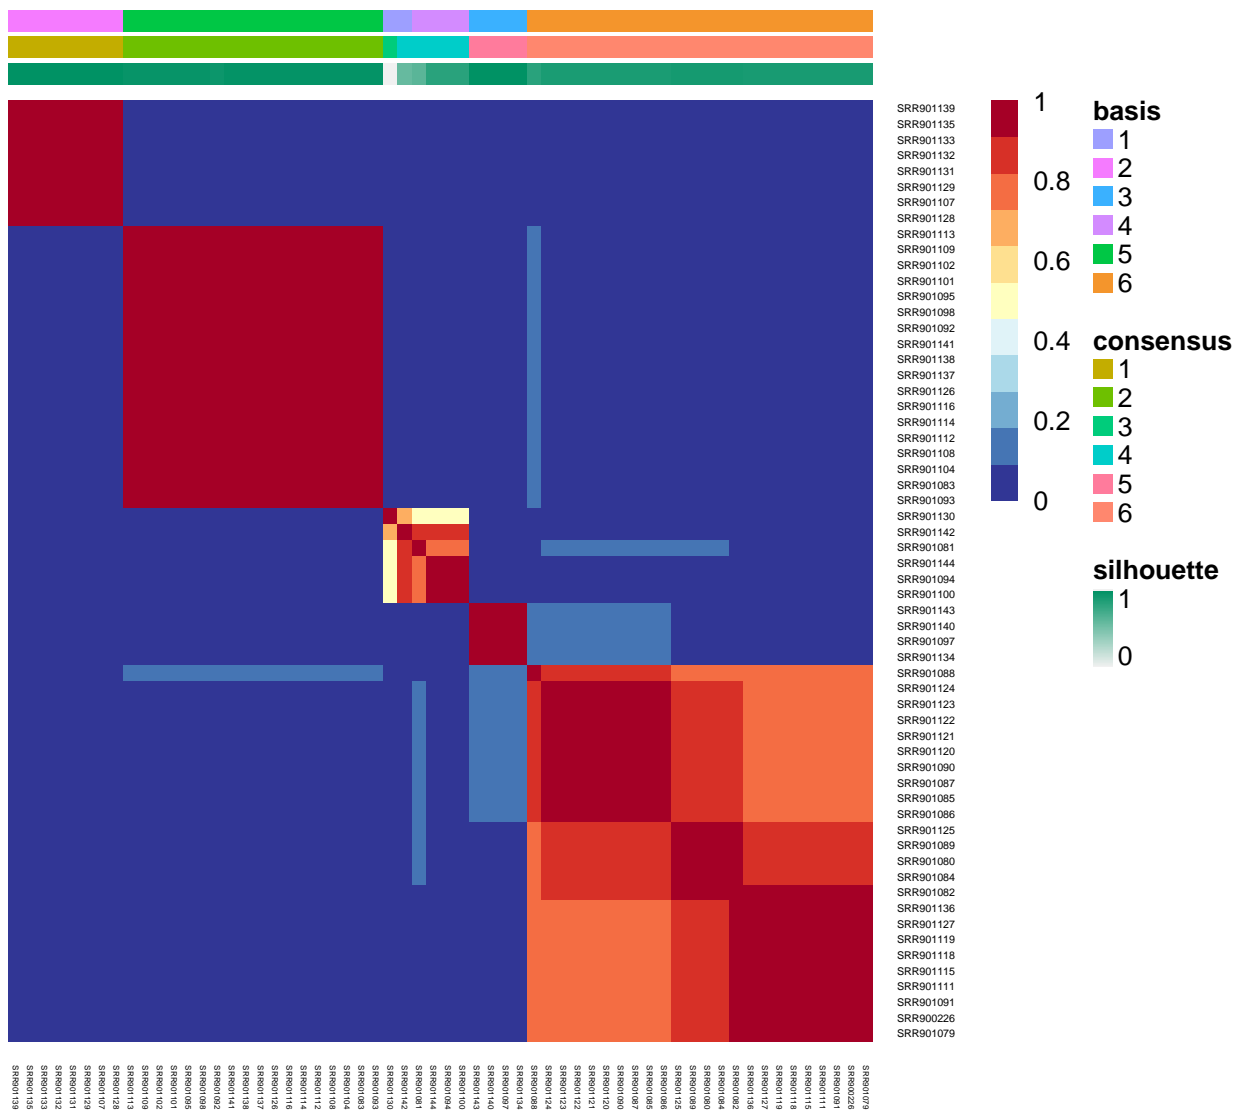

**rank = 7**

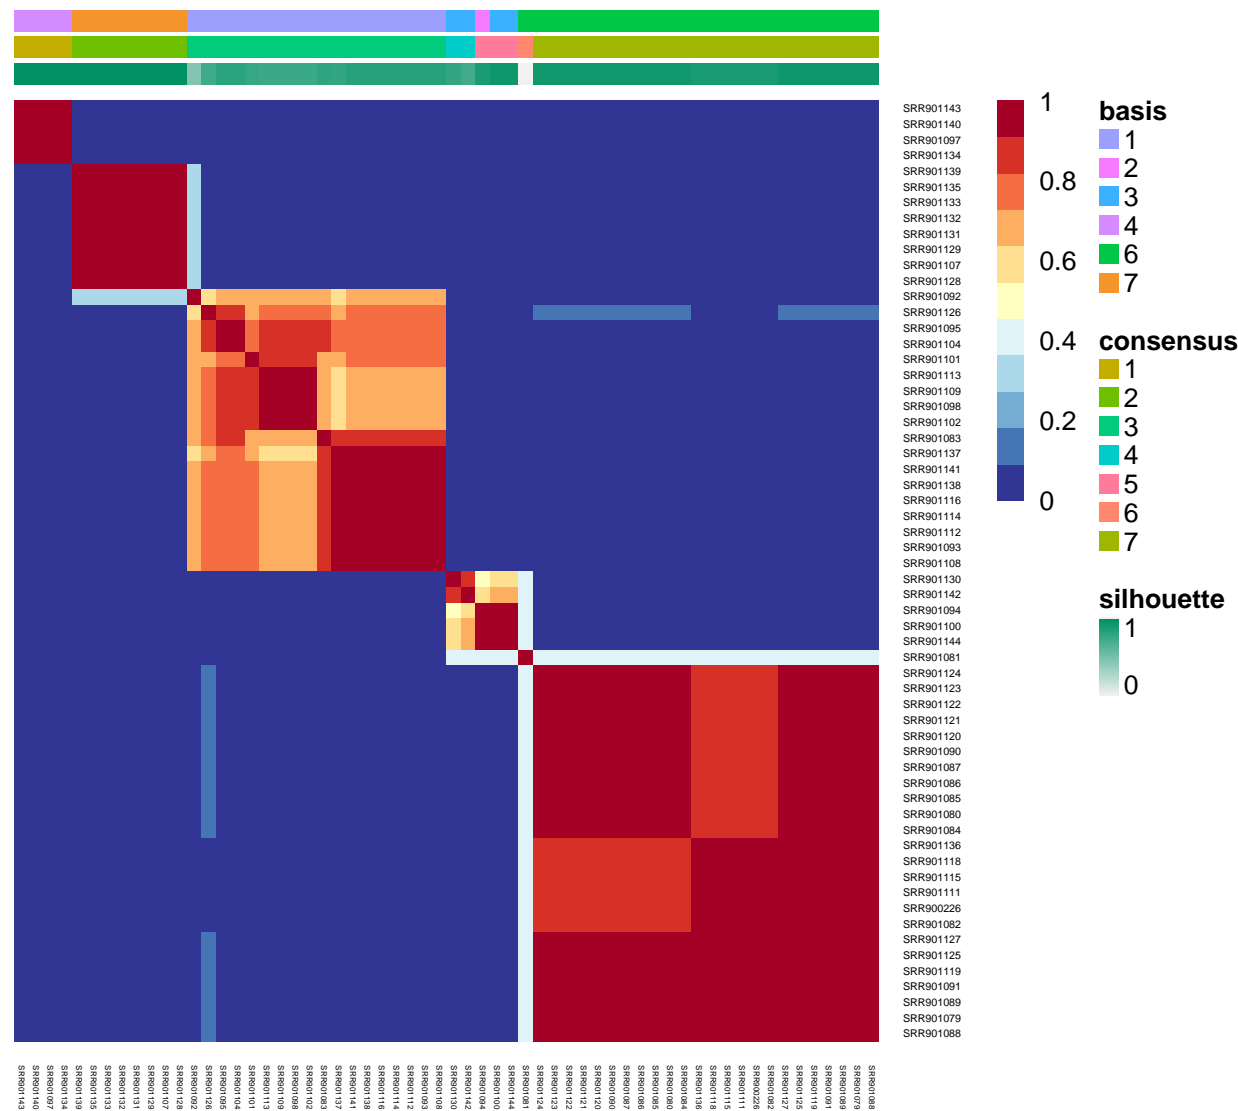

NMF rank survey

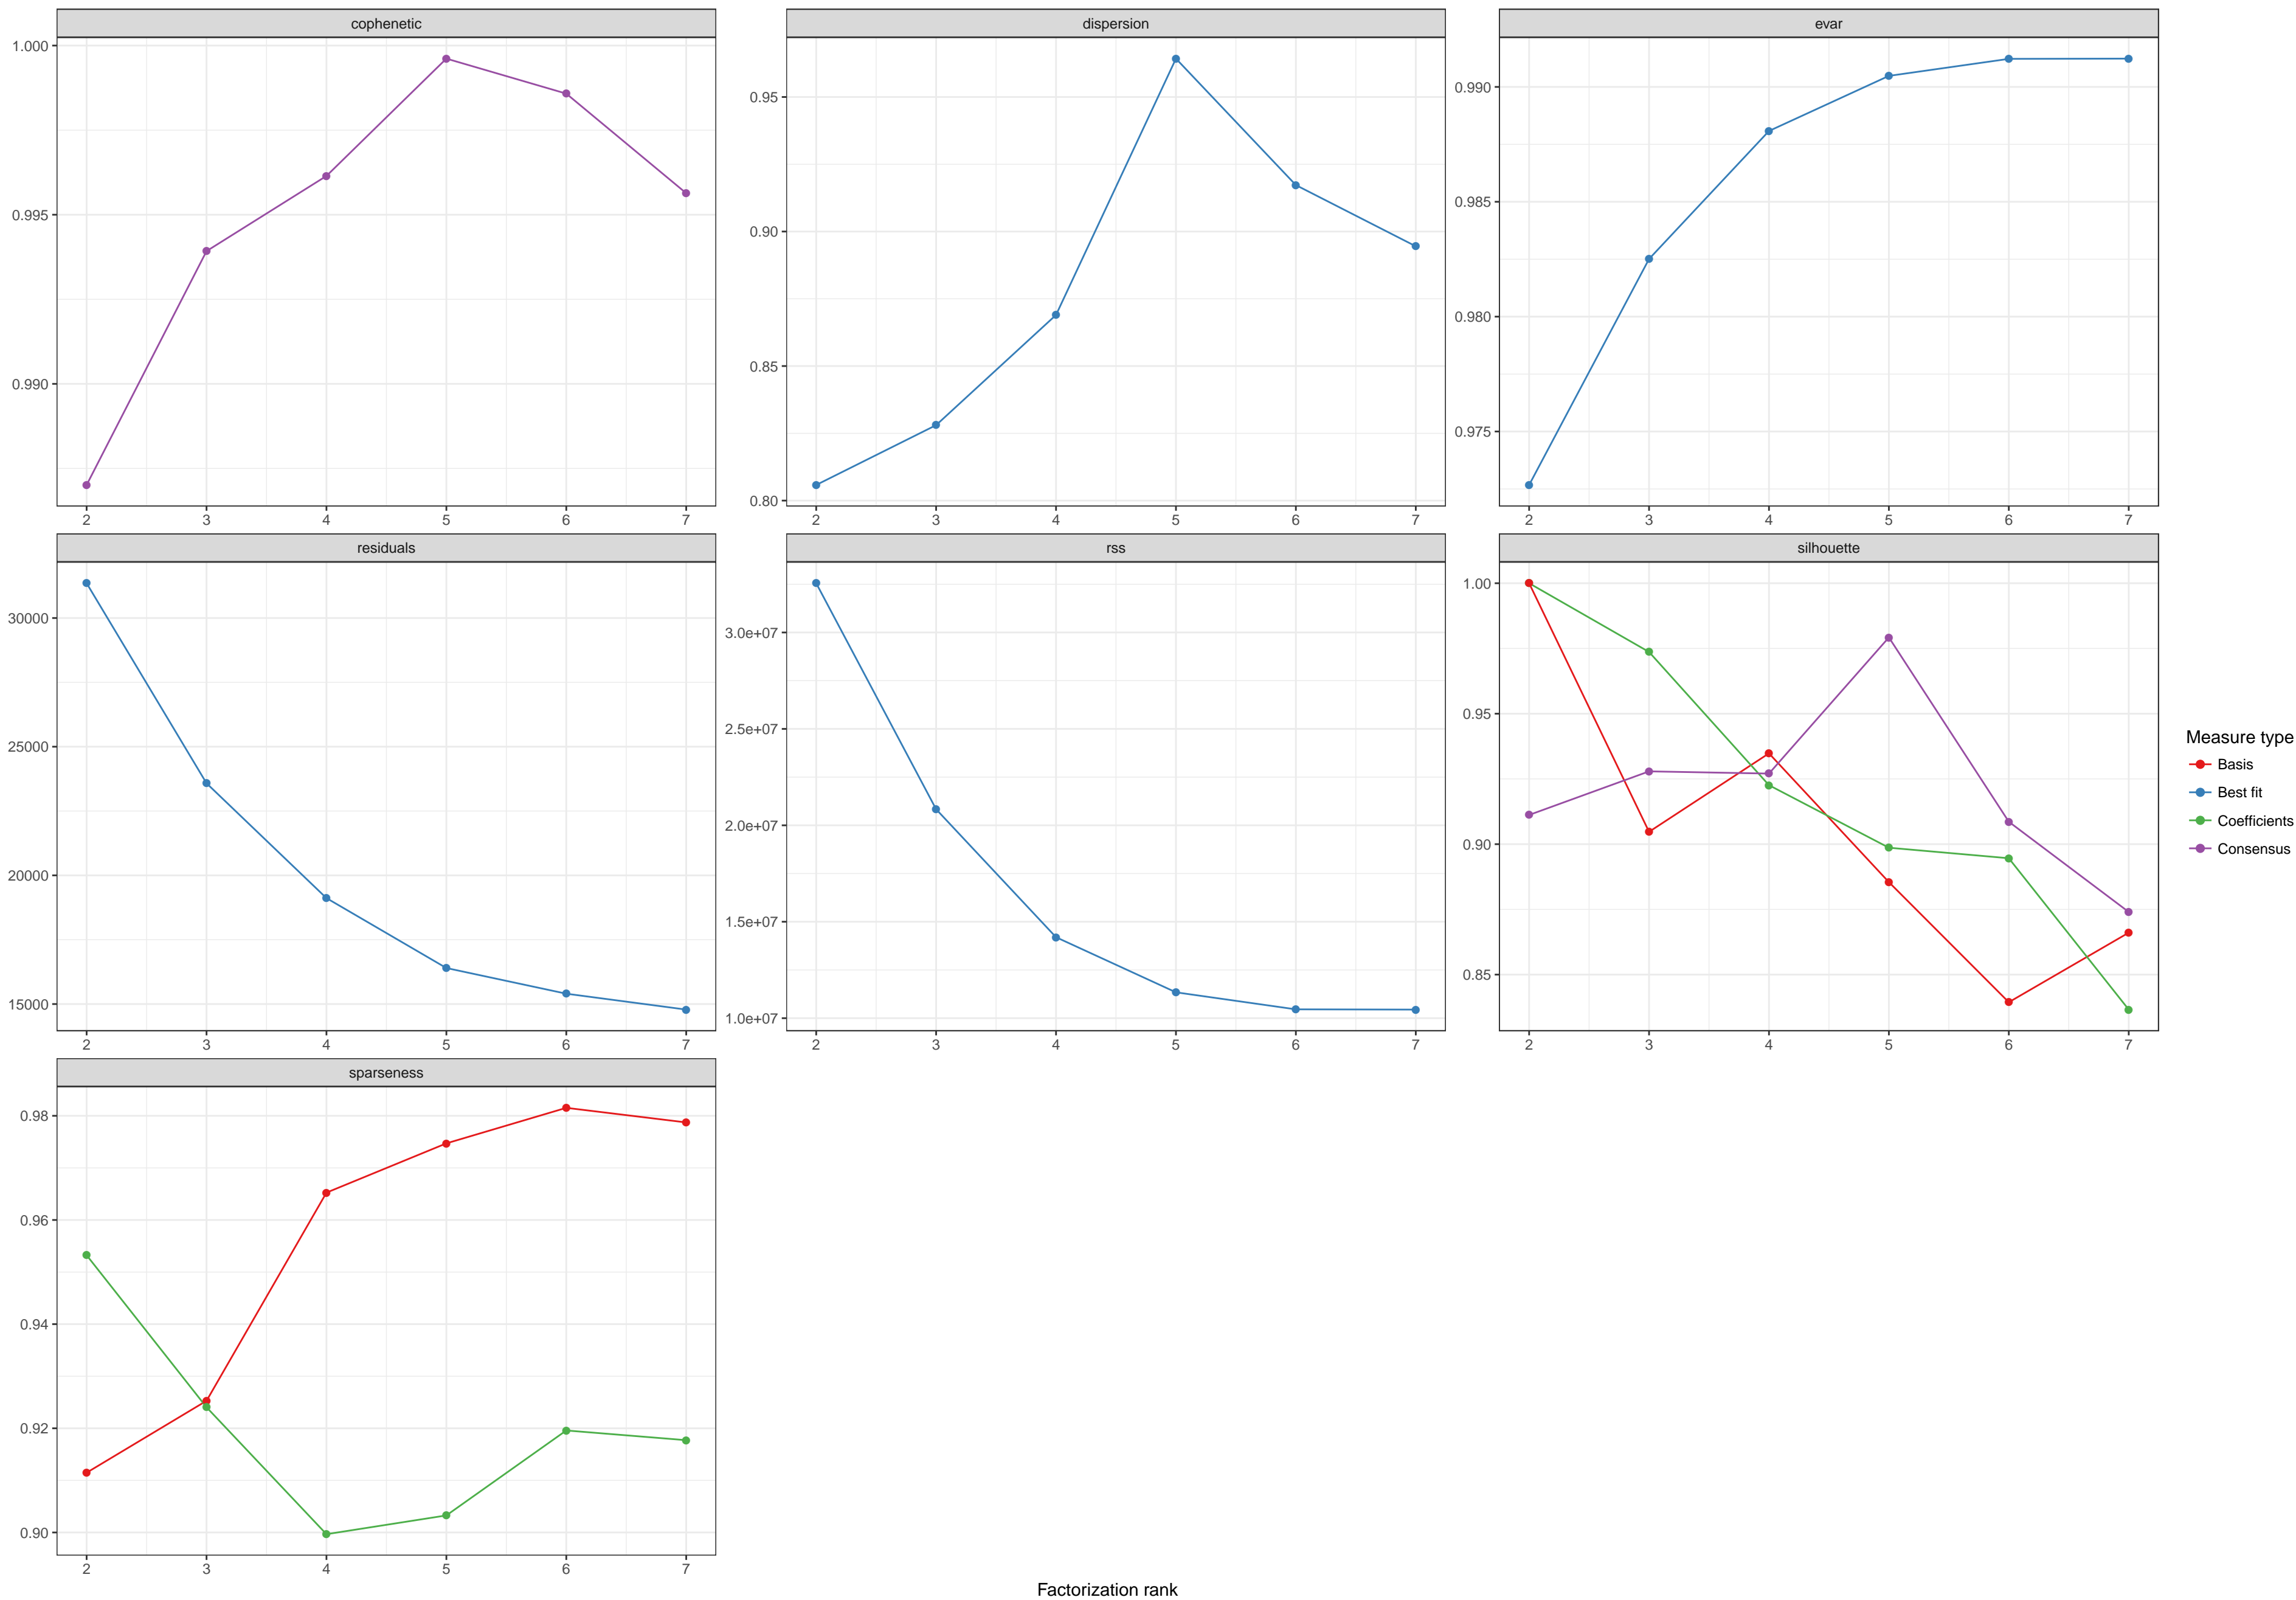

Supplement: Supplementary file [file 198614-1.zip]
