# Supplementary material
Source: bioRxiv or medRxiv preprint supplement (https://www.biorxiv.org/highwire/filestream/76703/field_highwire_adjunct_files/0/198614-1.zip)

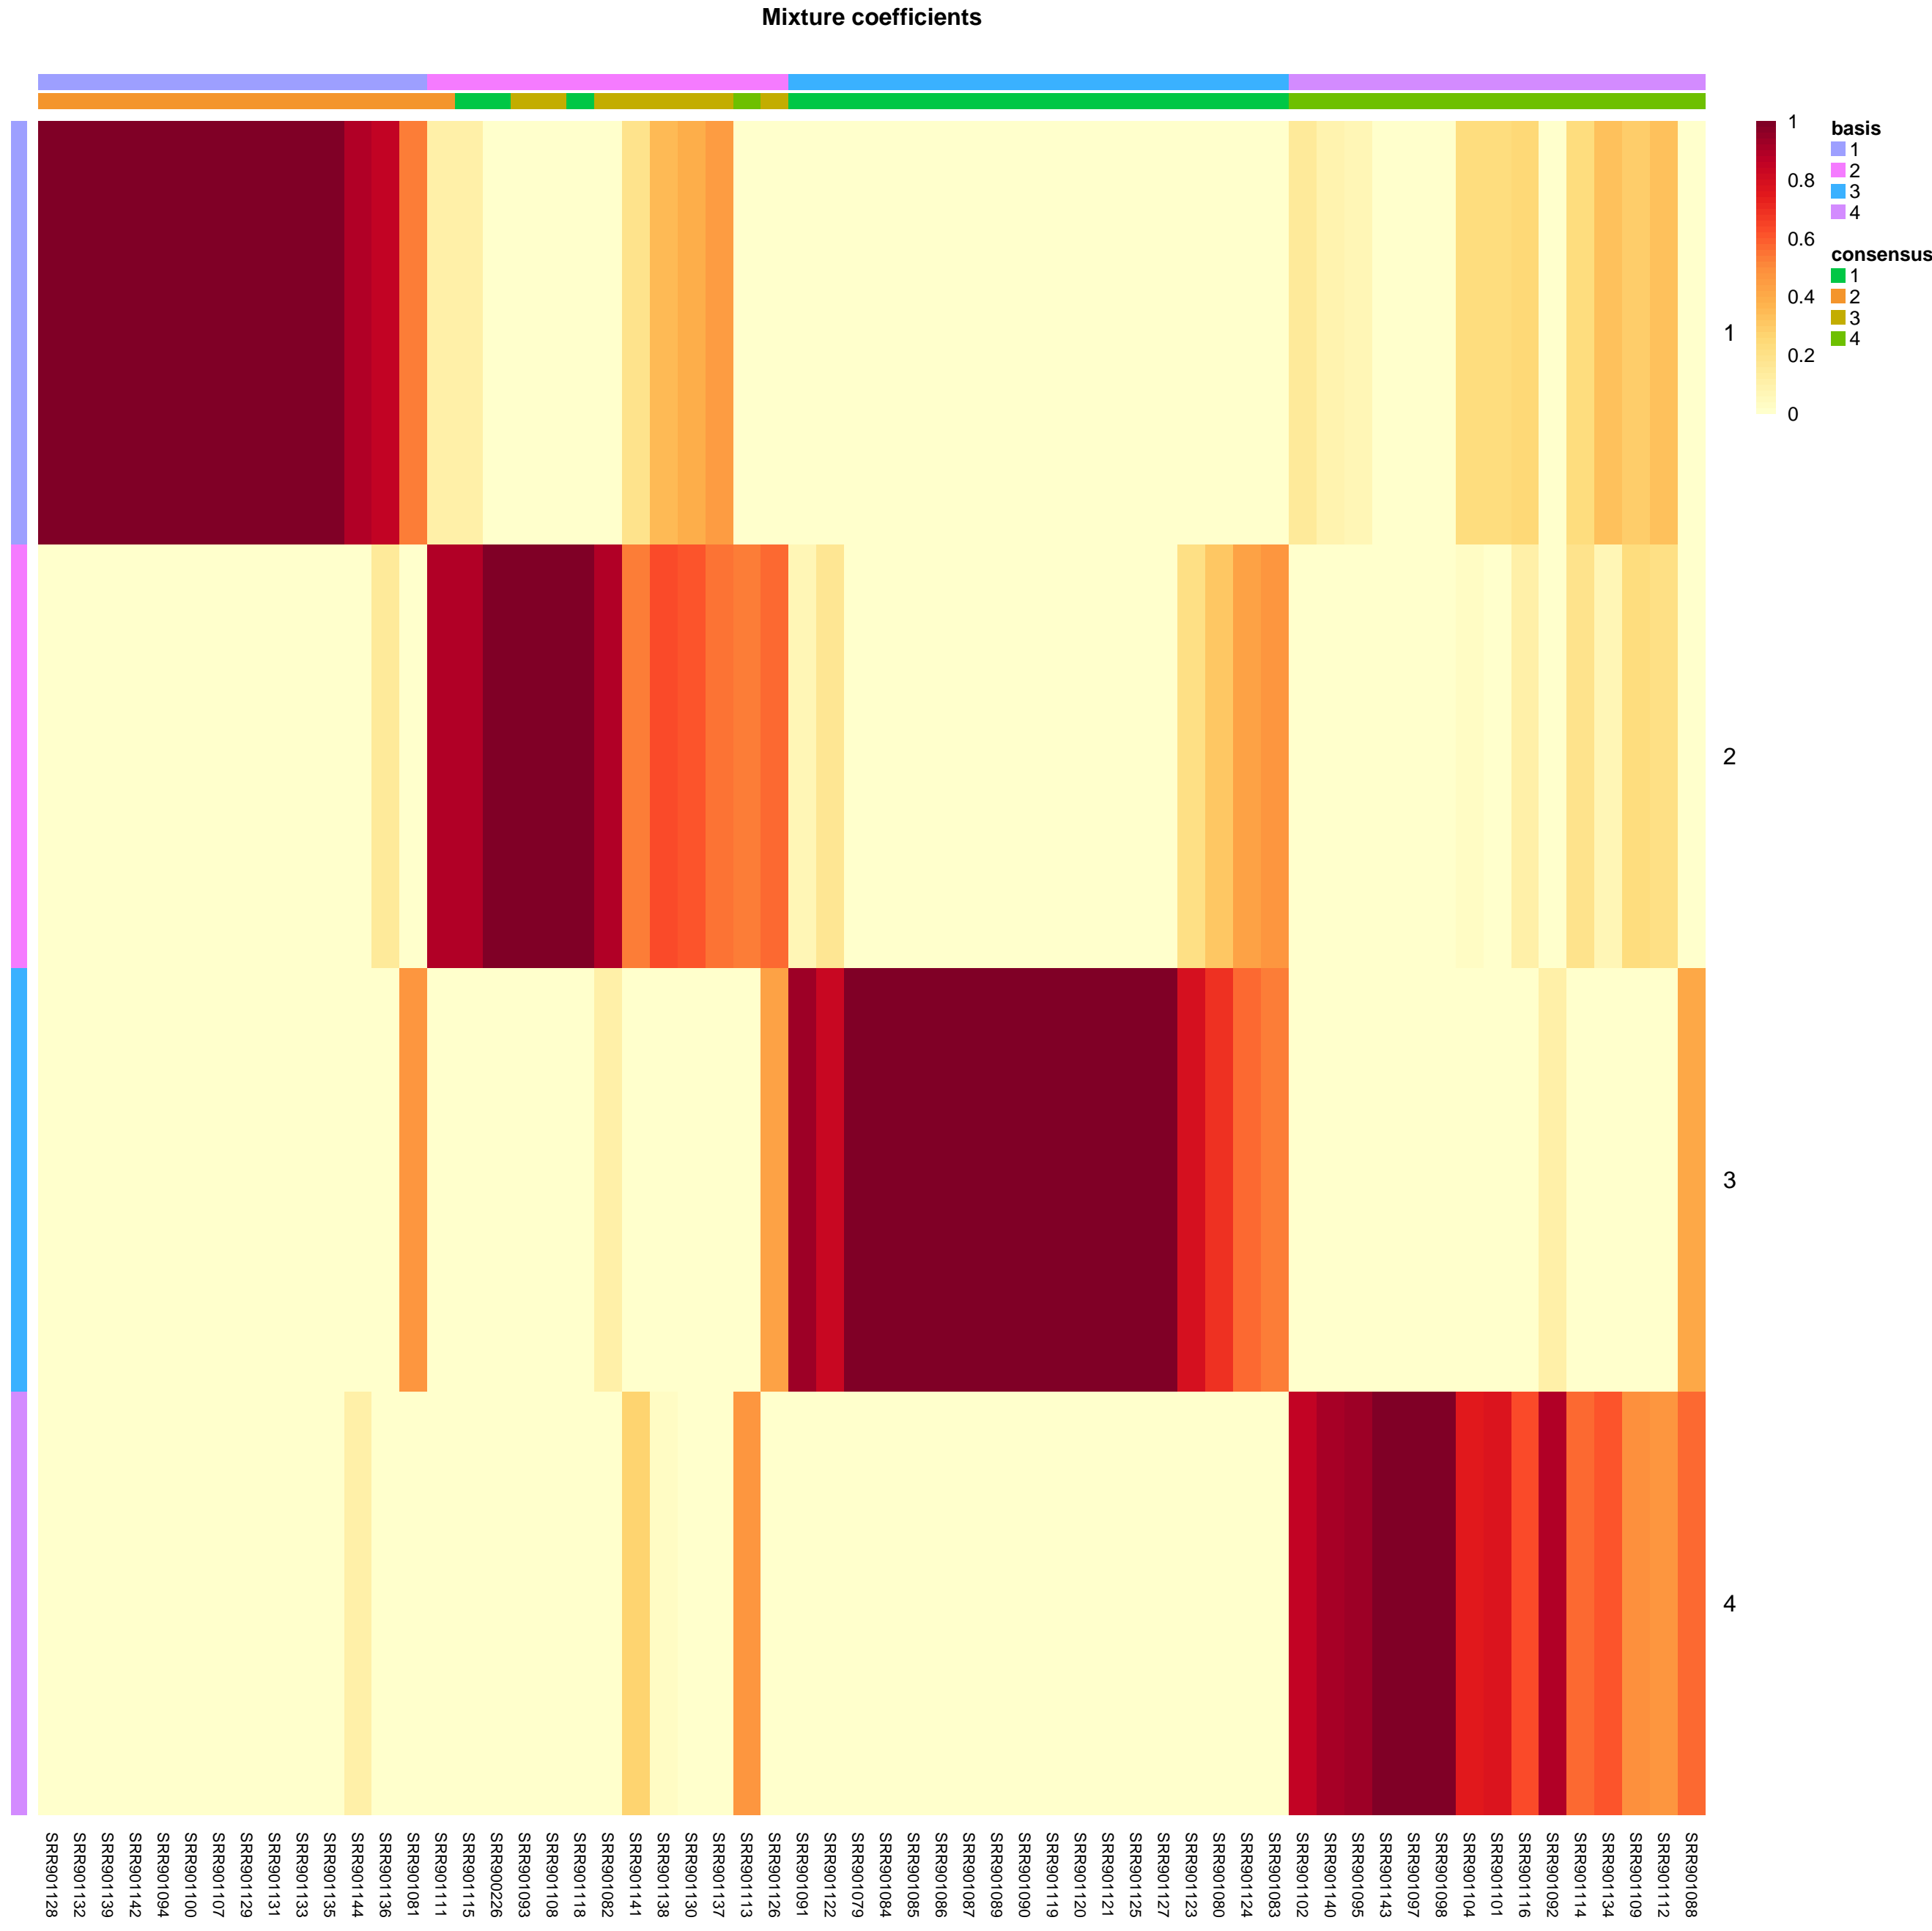

Basis components

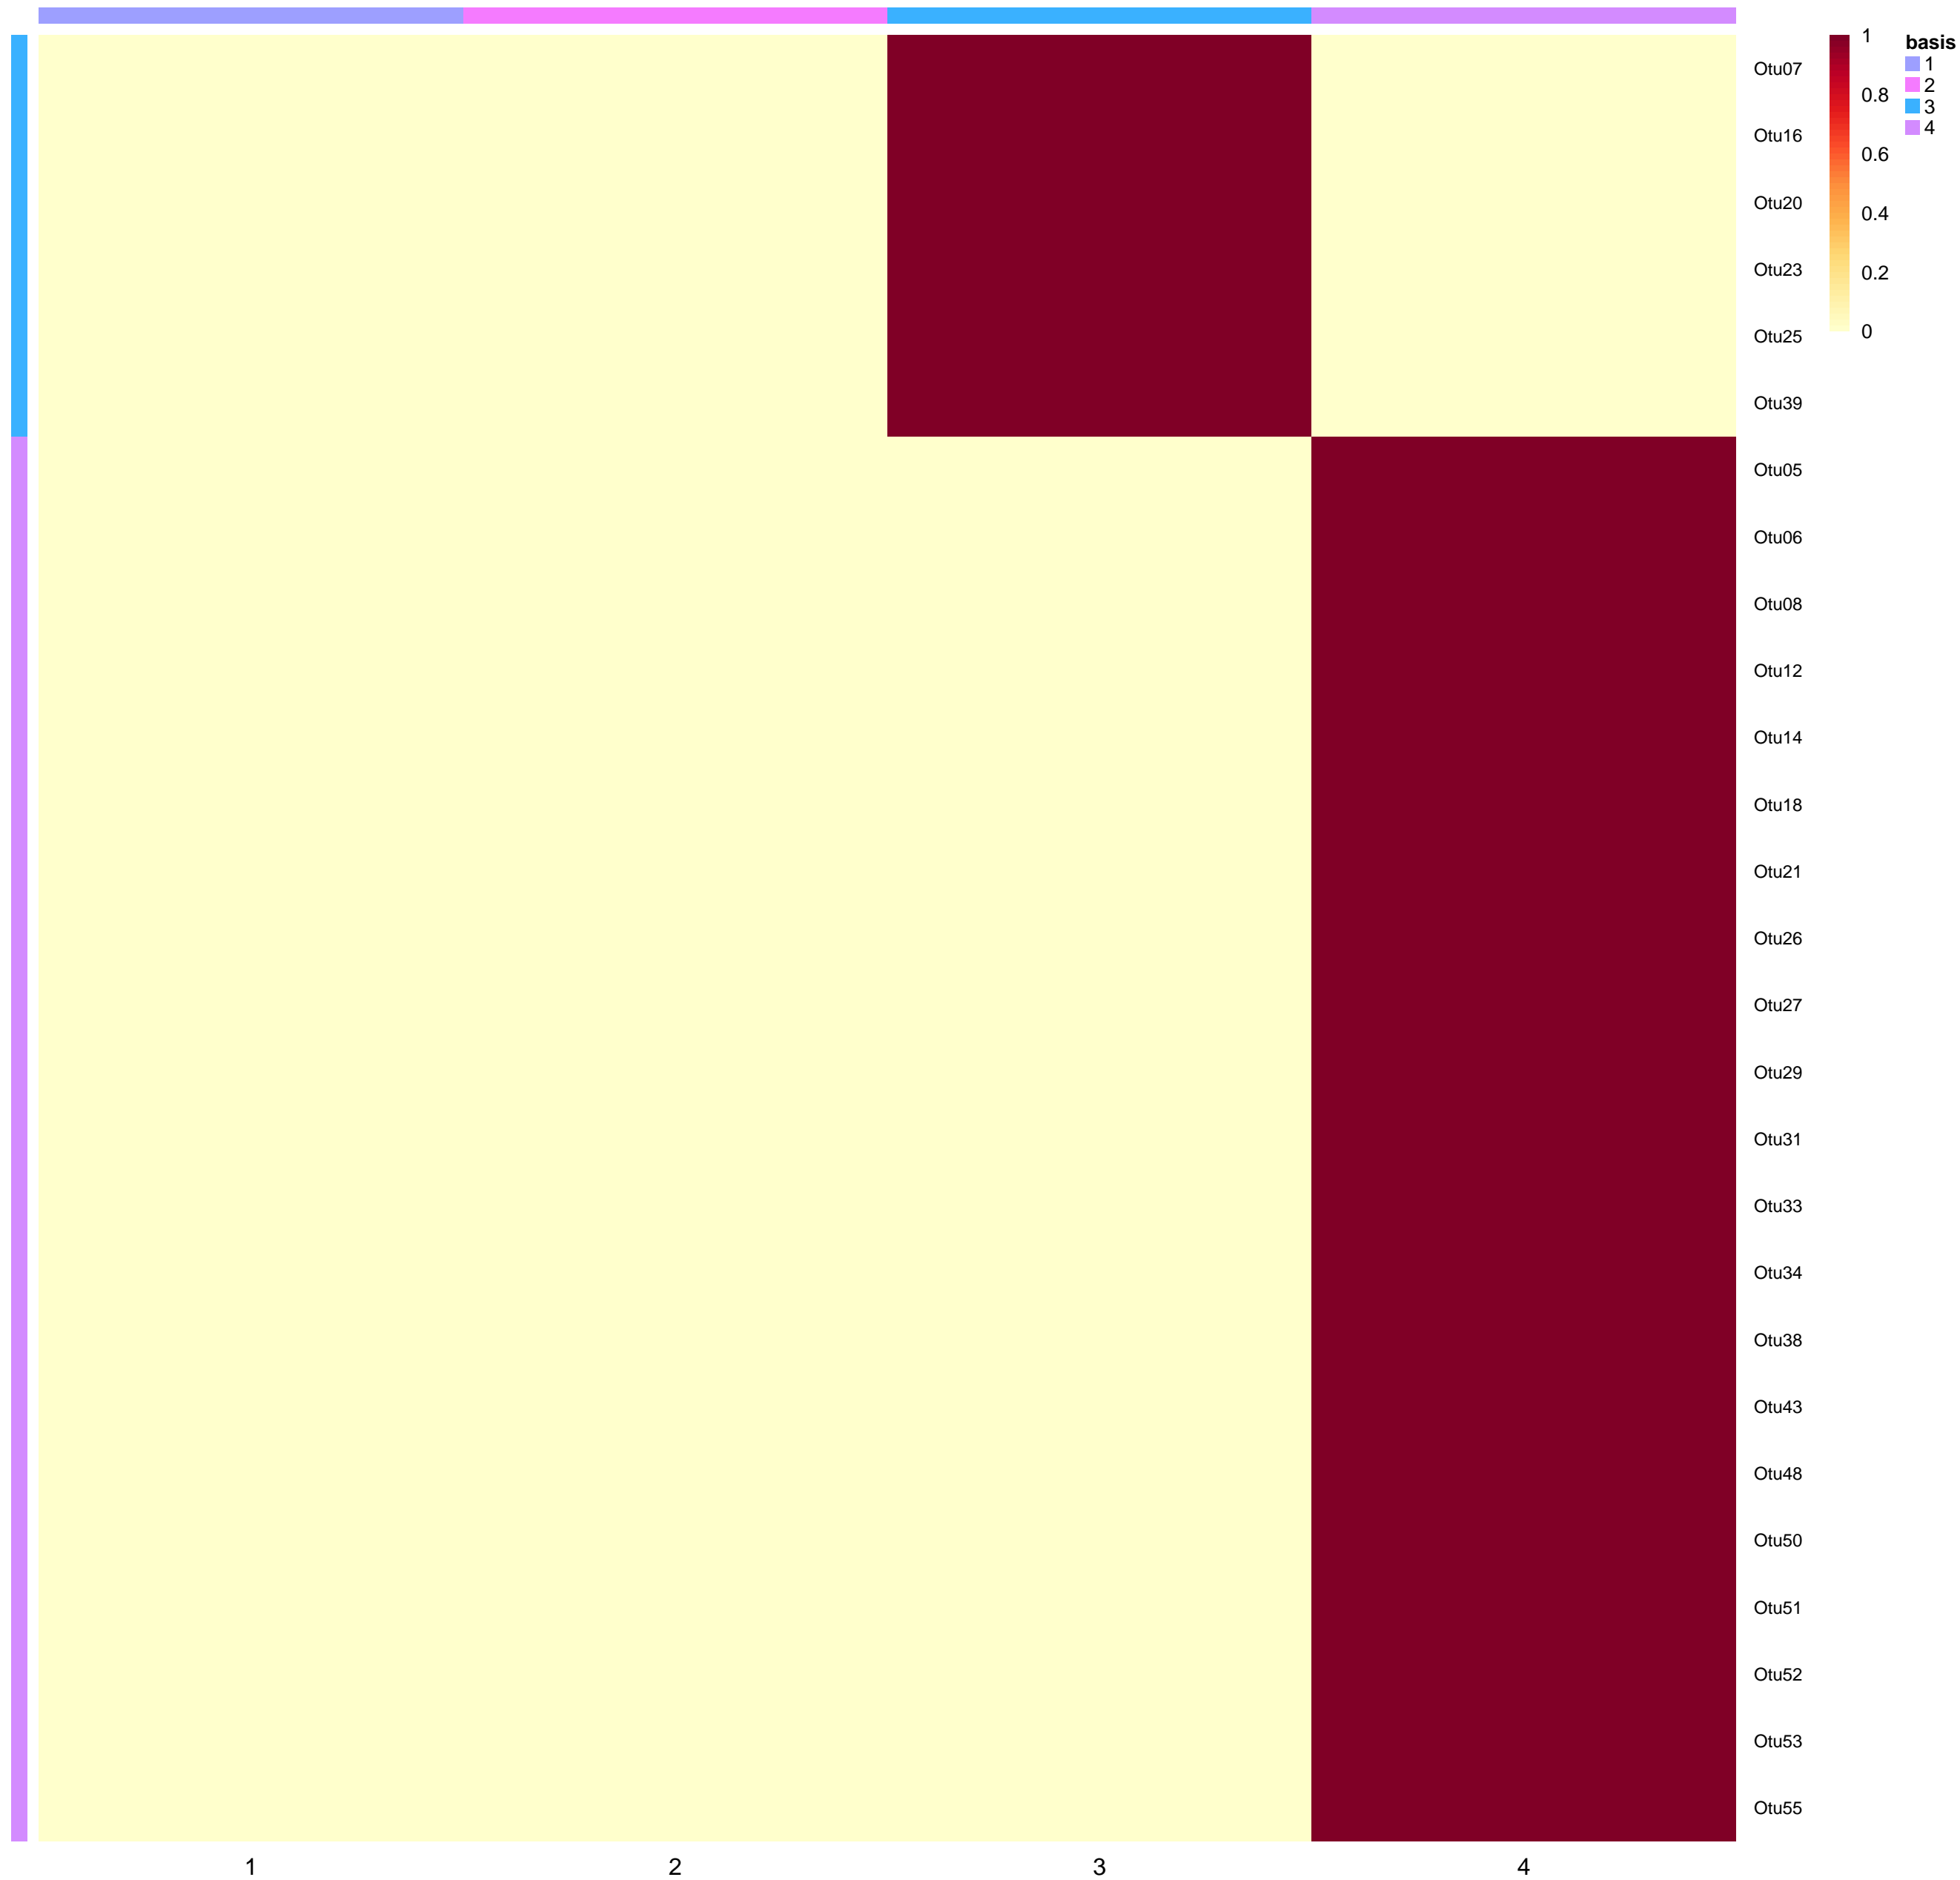

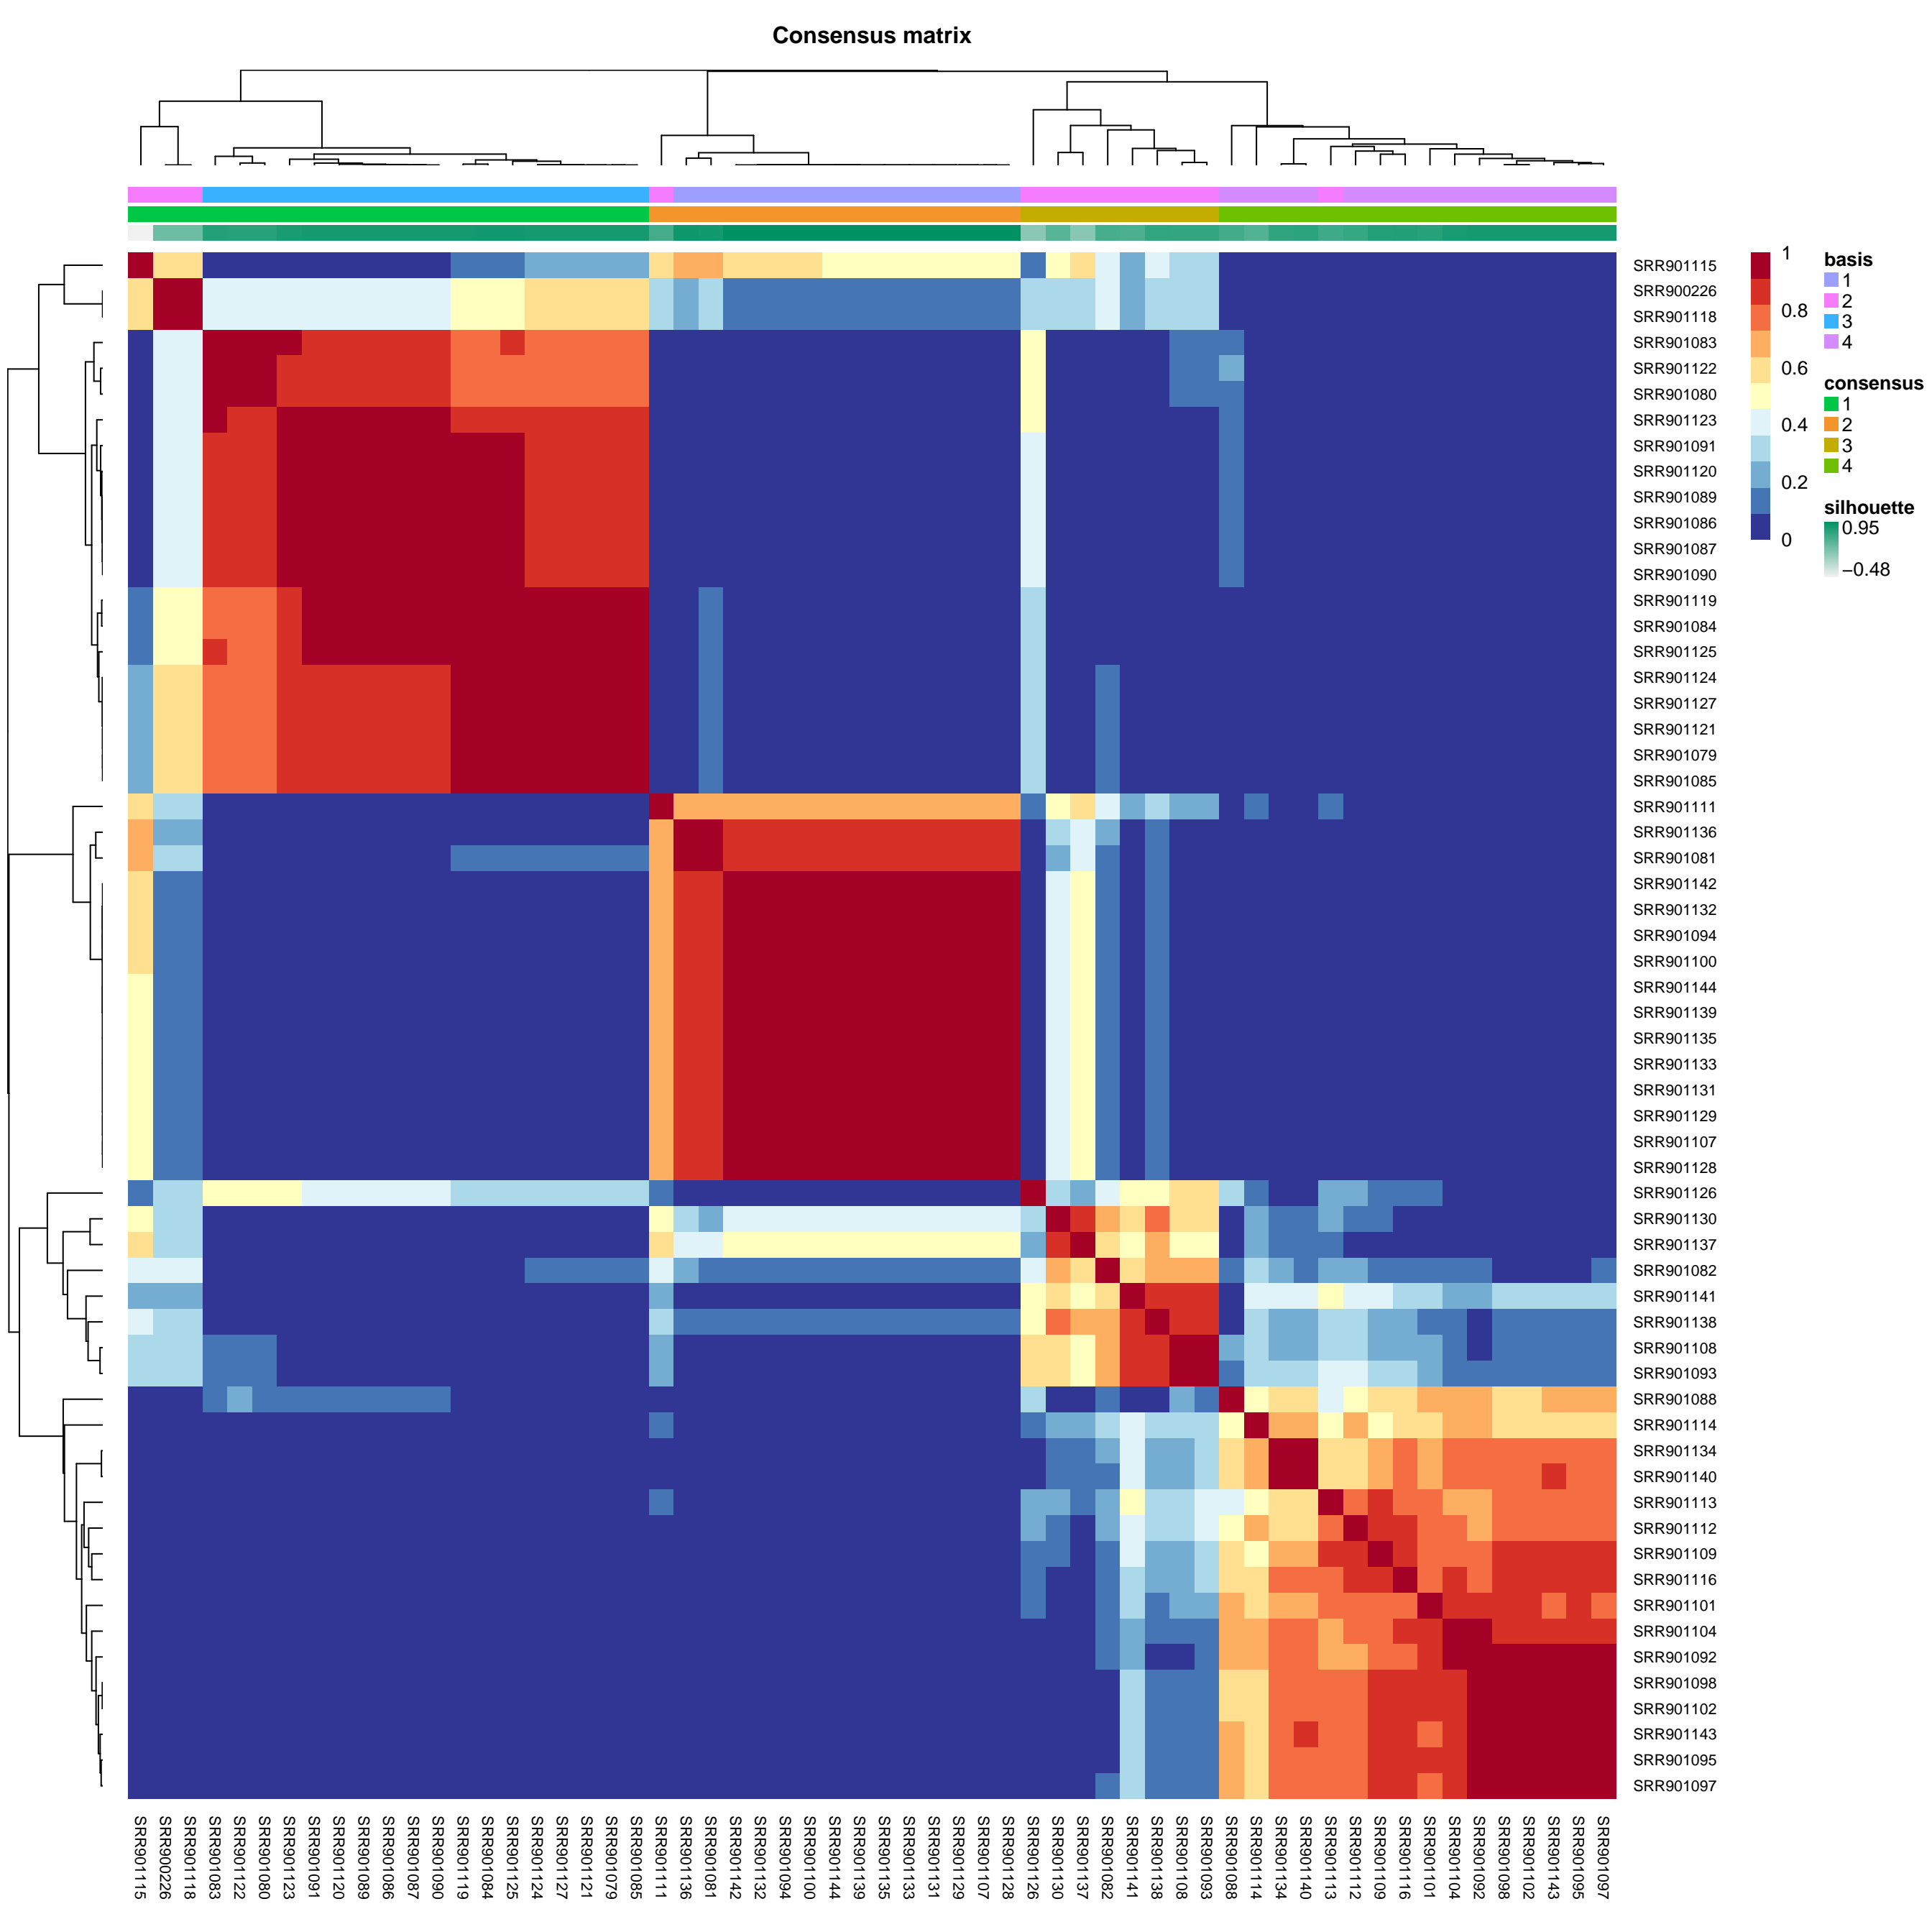

Supplement: Supplementary file [file 198614-1.zip]
